# Supplementary material for: The screening of drug-induced nephrotoxicity using gold nanocluster-based ratiometric fluorescent probes
Source: Royal Society of Chemistry journal article supplement (doi:10.1039/d1nr01006a), 2021-01-01
Supplement: d1nr01006a1.pdf [file d1nr01006a1.pdf]

## Supporting information

### **The Screening of Drug-induced Nephrotoxicity Using Gold Nanocluster-based Ratiometric Fluorescent Probes**

*Qin Liu,<sup>a</sup> Junyao Li,<sup>a</sup> Xiao Liu,<sup>b</sup> Lin Yuan,<sup>b</sup> Lingzhi Zhao,<sup>a</sup> Young-Tae Chang,<sup>c</sup>*

*Xiaogang Liu<sup>d</sup> and Juanjuan Peng<sup>\*a</sup>*

<sup>a</sup> State Key Laboratory of Natural Medicine, The School of Basic Medical Sciences and Clinical Pharmacy, China Pharmaceutical University, Nanjing, Jiangsu 211198, China. Email: pjj@cpu.edu.cn

<sup>b</sup> State Key Laboratory of Chemo/Biosensing and Chemometrics, College of Chemistry and Chemical Engineering, Hunan University, Changsha 410082, Hunan, PR China.

<sup>c</sup> Department of Chemistry, Pohang University of Science and Technology, Pohang, Gyeongbuk 37673, Korea.

<sup>d</sup> Department of Chemistry, National University of Singapore, 117543, Singapore.

**Table S1** The photophysical properties of the fluorescent •OH probes.

| Probes                 | $\lambda_{\text{ex}}$<br>(nm) | $\lambda_{\text{em}}$ (nm) | Linear<br>range ( $\mu\text{M}$ ) | Detection<br>limit ( $\mu\text{M}$ ) | Application | Ref.         |
|------------------------|-------------------------------|----------------------------|-----------------------------------|--------------------------------------|-------------|--------------|
| BMPTA-Tb <sup>3+</sup> | 320                           | 545                        | 0.1-10                            | 0.27                                 | cell        | R1           |
| DNA-AgNCs              | 440                           | 550                        | 0.05-5                            | -                                    | cell        | R2           |
| AuNC@HPF               | 488                           | 515 and 632                | 0-150                             | 0.68                                 | cell        | R3           |
| Si QDs-Ce6             | 410                           | 490 and 660                | 1-200                             | 0.97                                 | cell        | R4           |
| GQD-hydroIR783         | 440                           | 520 and 800                | 0-20                              | 0.2                                  | mice        | R5           |
| AuNCs-CS               | 440                           | 600 and 740                | 0.5-40                            | 0.014                                | mice        | This<br>work |

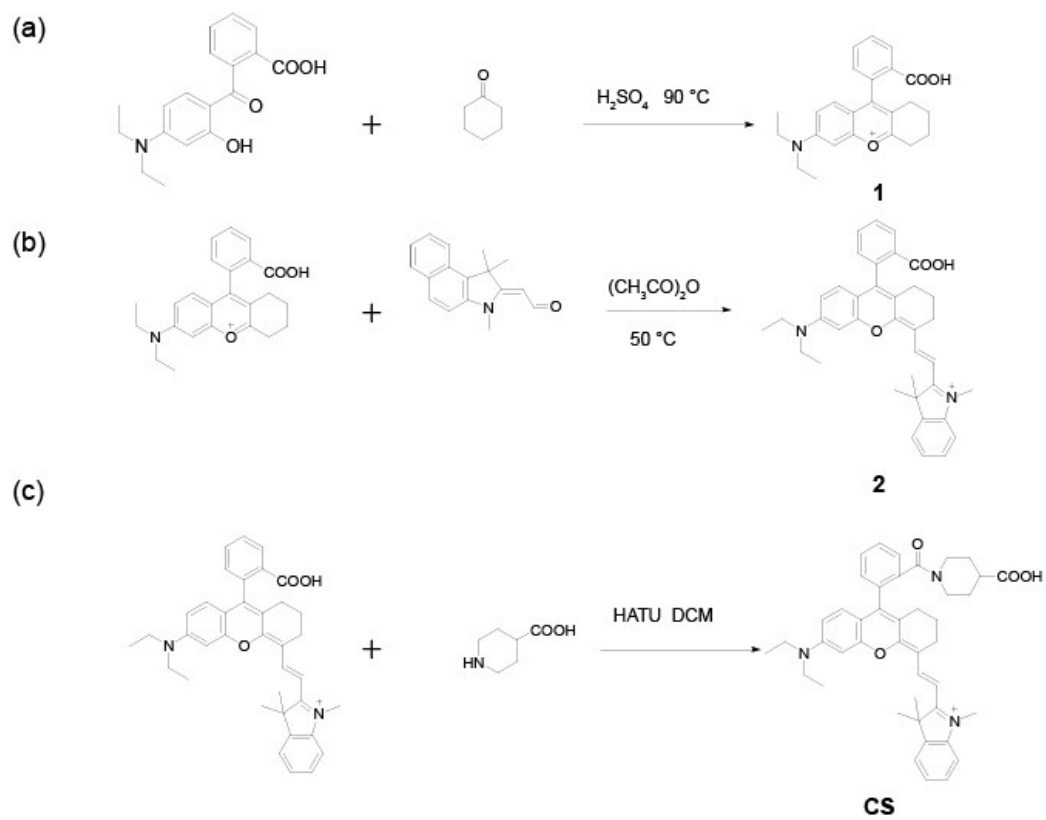

**Scheme S1** The synthetic scheme for the compound CS.

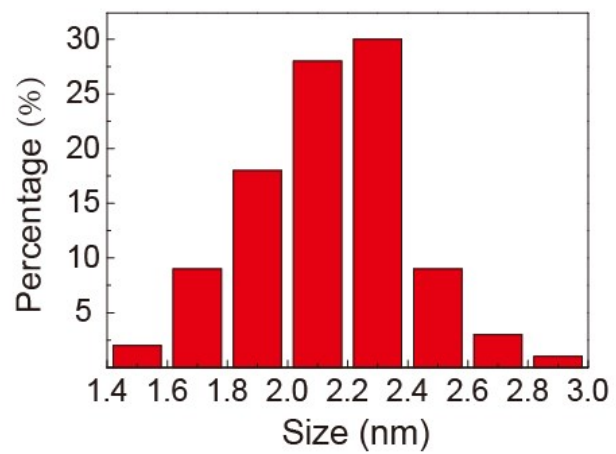

**Figure S1** The size distribution of the AuNCs. Data were obtained by measuring 100 particles from the TEM images.

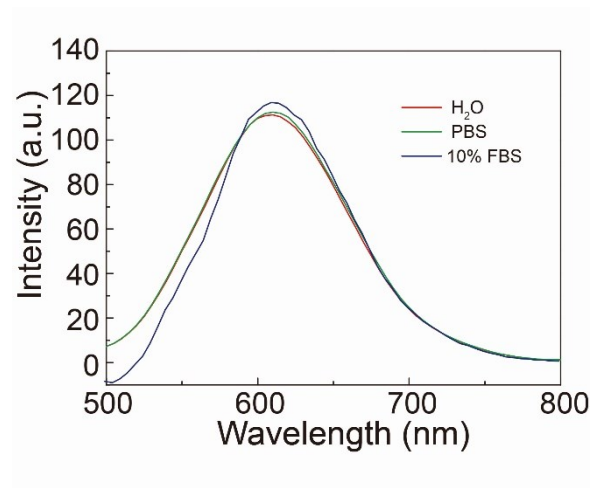

**Figure S2** The fluorescence of AuNCs dispersed in different medium.

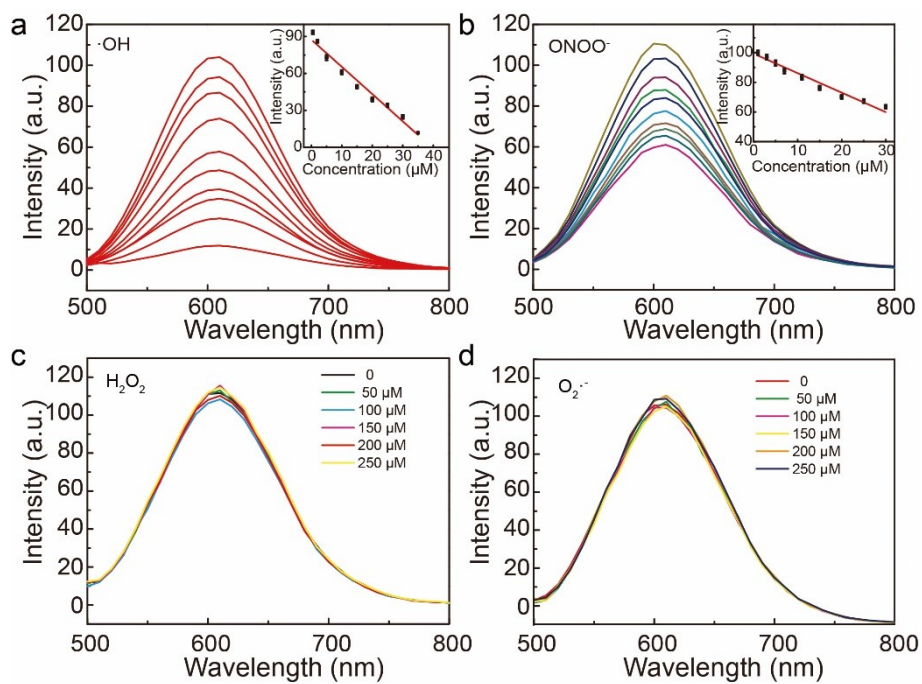

**Figure S3** The fluorescence spectra of AuNCs upon addition of  $\cdot\text{OH}$  (0-50  $\mu\text{M}$ ),  $\text{ONOO}^-$  (0-30  $\mu\text{M}$ ),  $\text{H}_2\text{O}_2$  (0-250  $\mu\text{M}$ ) or  $\text{O}_2\cdot^-$  (0-250  $\mu\text{M}$ ) in physiological saline solution.  $\lambda_{\text{ex}} = 440 \text{ nm}$ .

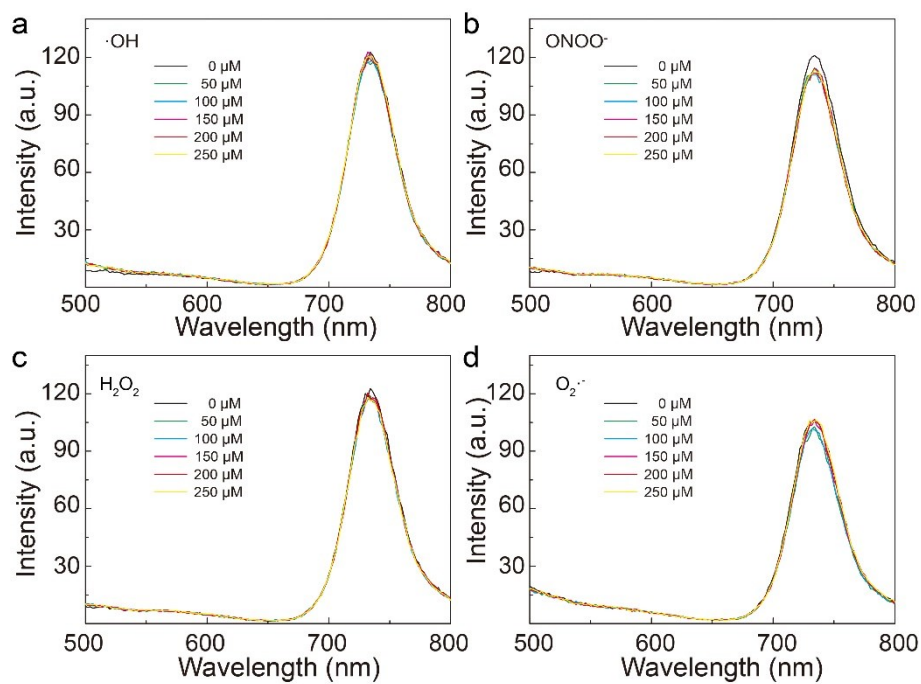

**Figure S4** The fluorescence spectra of CS upon addition of different kinds of ROS, including  $\cdot\text{OH}$  (0-250  $\mu\text{M}$ ),  $\text{ONOO}^-$  (0-50  $\mu\text{M}$ ),  $\text{H}_2\text{O}_2$  (0-250  $\mu\text{M}$ ) and  $\text{O}_2^{\cdot-}$  (0-250  $\mu\text{M}$ ), in physiological saline solution ( $\lambda_{\text{ex}} = 440 \text{ nm}$ ).

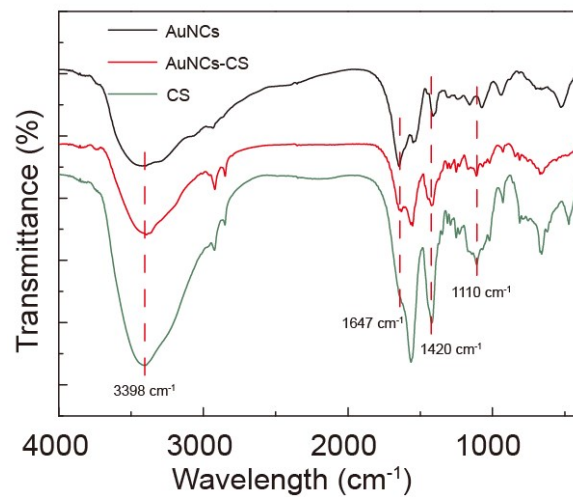

**Figure S5** The FT-IR spectra of AuNCs, CS and CS-modified AuNCs.



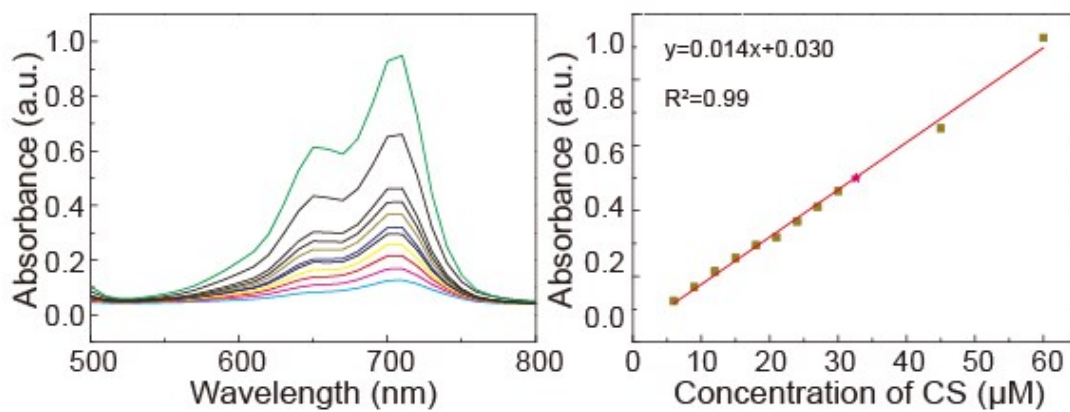

**Figure S6** The absorption spectra of CS at different concentrations (6 to 60  $\mu\text{M}$ ).

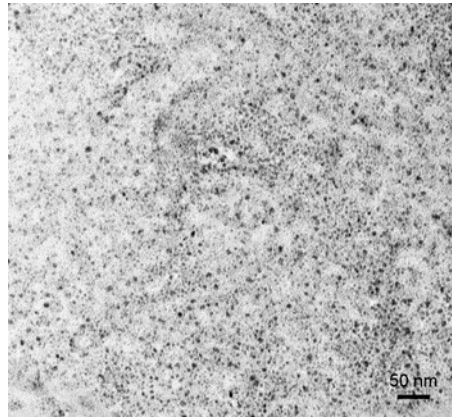

**Figure S7** The TEM imaging of CS-modified AuNCs.

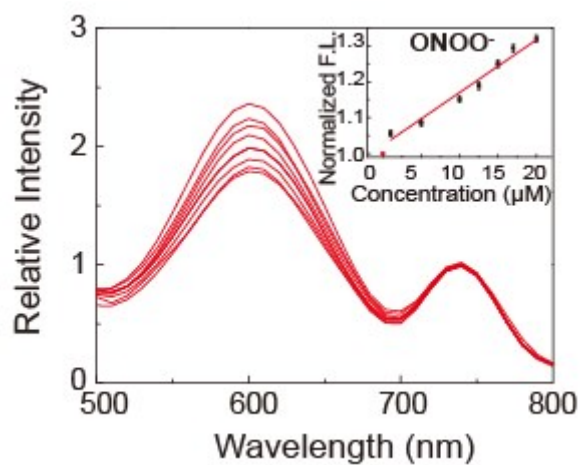

**Figure S8** The fluorescence spectra of CS-modified AuNCs with different concentrations of ONOO<sup>-</sup> (1, 5, 10, 12.5, 15, 17 and 20 μM).

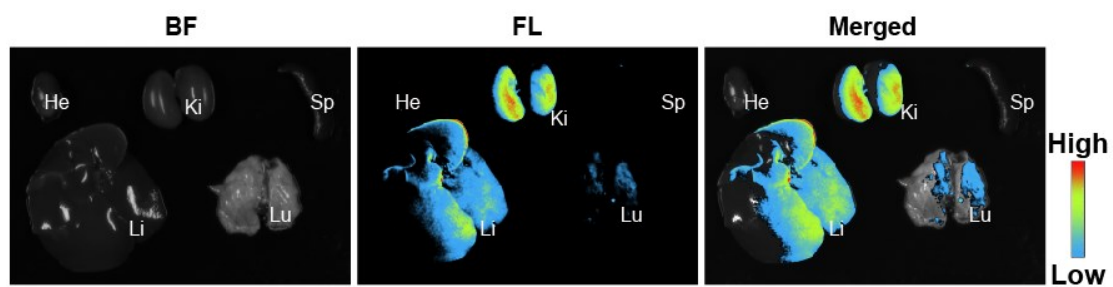

**Figure S9** The fluorescent bioimaging of representative organs of mice after intravenous injection of AuNCs (He: heart; Ki: kidney; Sp: spleen; Li: liver; Lu: lung).

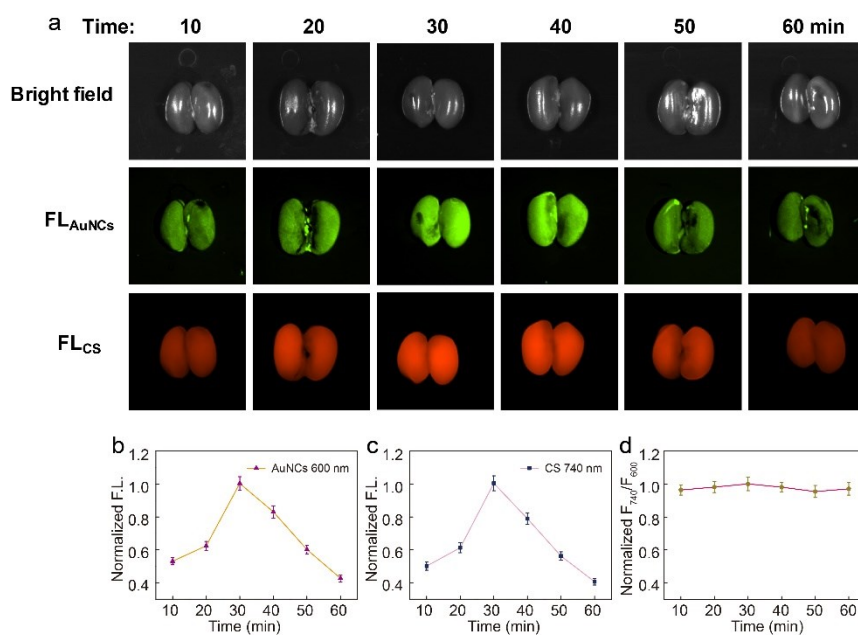

**Figure S10** a) The representative fluorescence images for the mice injected with AuNCs-CS with different time. The normalized luminescence intensities of b) AuNCs, c) CS and d) the values of  $F_{740}/F_{600}$  ( $n=3$  for each group).

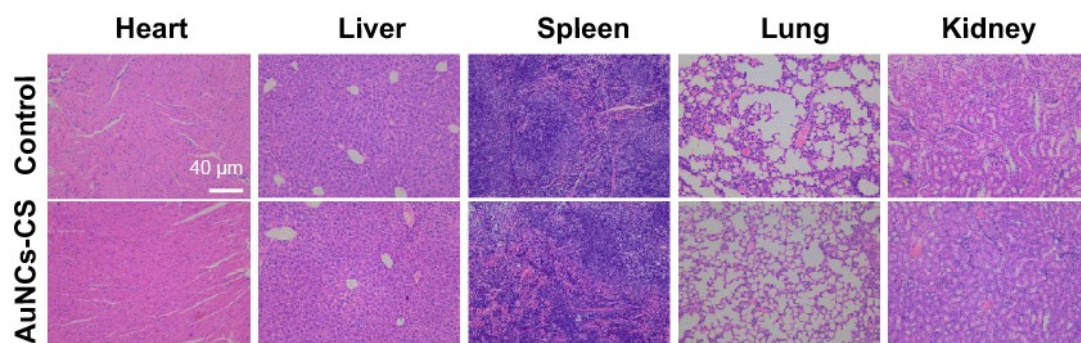

**Figure S11** The H&E staining of heart, liver, spleen, lung and kidney of mice injected with saline or CS-modified AuNCs for 24 h.

LX-670 #2 RT: 0.01 AV: 1 NL: 1.28E9  
T: + c ESI Full ms [470.00-870.00]

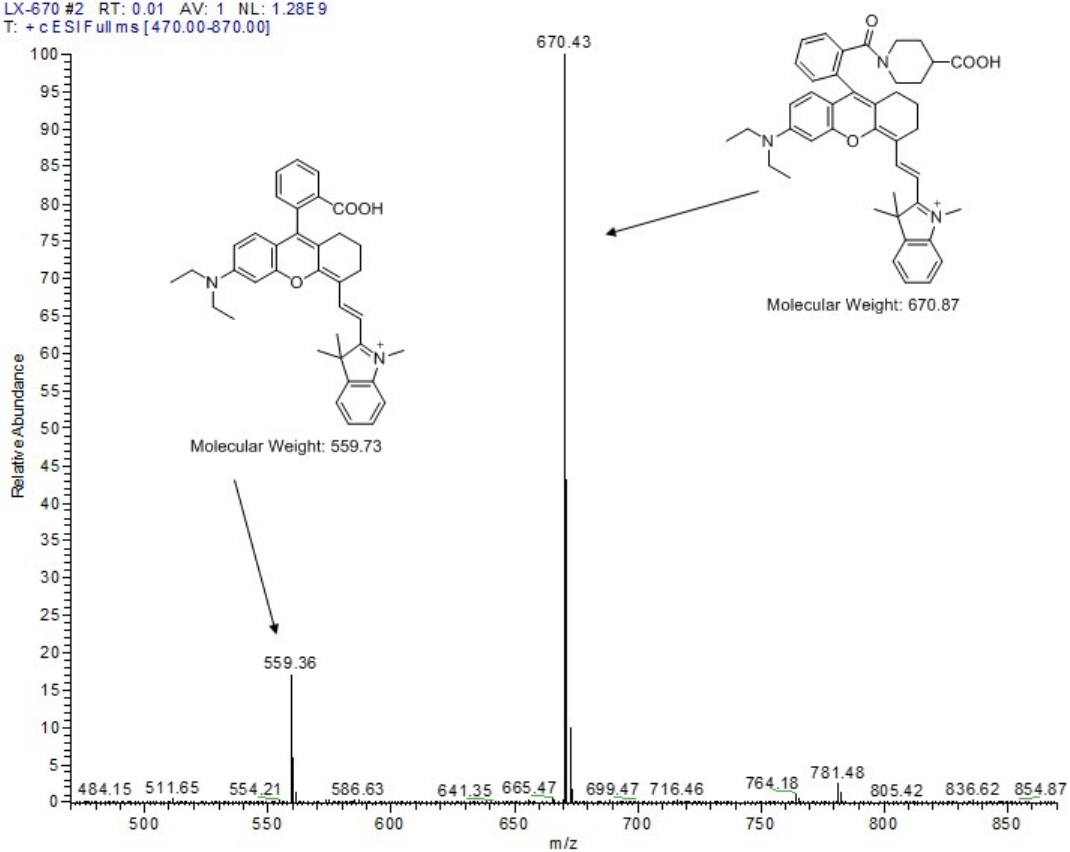

Figure S12 The mass spectrum of the compound CS.

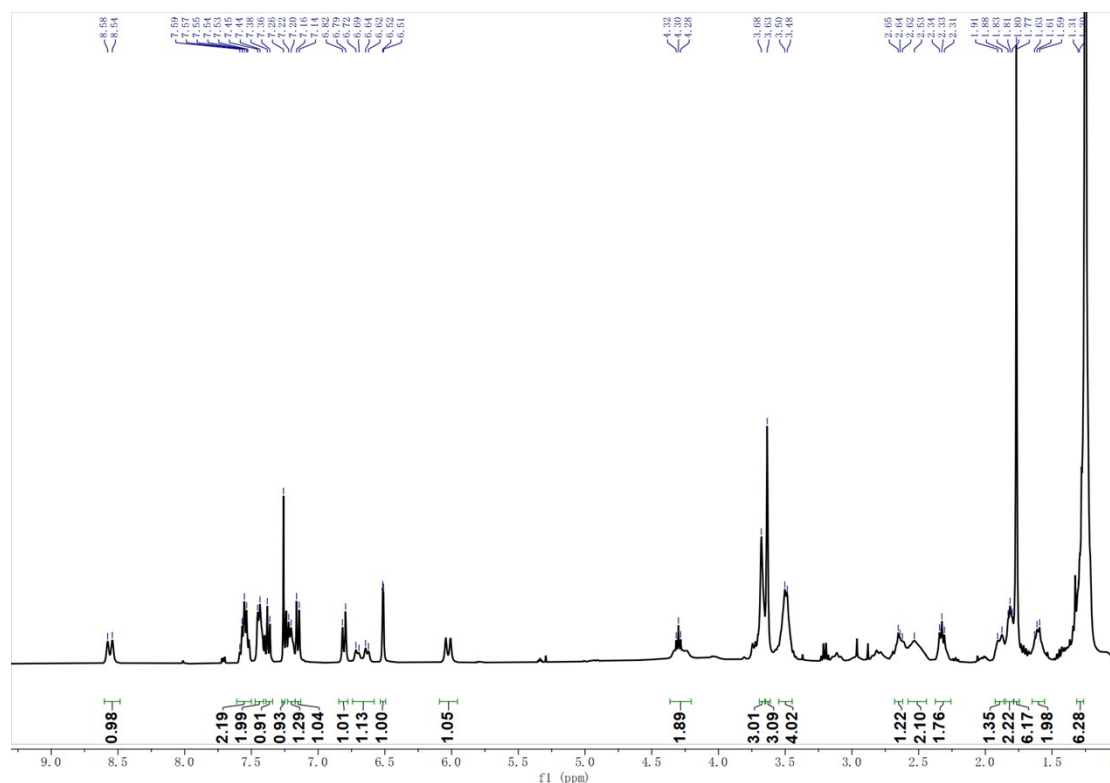

**Figure S13** The <sup>1</sup>H NMR spectra of the compound CS. <sup>1</sup>H NMR (400 MHz, Chloroform-d) δ 8.56 (d, *J* = 13.8 Hz, 1H), 7.61 – 7.50 (m, 2H), 7.44 (d, *J* = 7.2 Hz, 2H), 7.37 (d, *J* = 7.8 Hz, 1H), 7.26 (s, 1H), 7.21 (d, *J* = 7.3 Hz, 1H), 7.15 (d, *J* = 8.0 Hz, 1H), 6.81 (d, *J* = 9.2 Hz, 1H), 6.67 (dd, *J* = 28.6, 9.2 Hz, 1H), 6.51 (d, *J* = 2.3 Hz, 1H), 6.03 (d, *J* = 14.1 Hz, 1H), 4.30 (t, *J* = 6.7 Hz, 2H), 3.68 (s, 3H), 3.63 (s, 3H), 3.49 (d, *J* = 7.5 Hz, 4H), 2.64 (d, *J* = 12.5 Hz, 1H), 2.53 (s, 2H), 2.33 (t, *J* = 7.5 Hz, 2H), 1.89 (d, *J* = 13.2 Hz, 1H), 1.81 (t, *J* = 6.2 Hz, 2H), 1.77 (s, 6H), 1.61 (t, *J* = 7.6 Hz, 2H), 1.30 (d, *J* = 4.2 Hz, 6H).



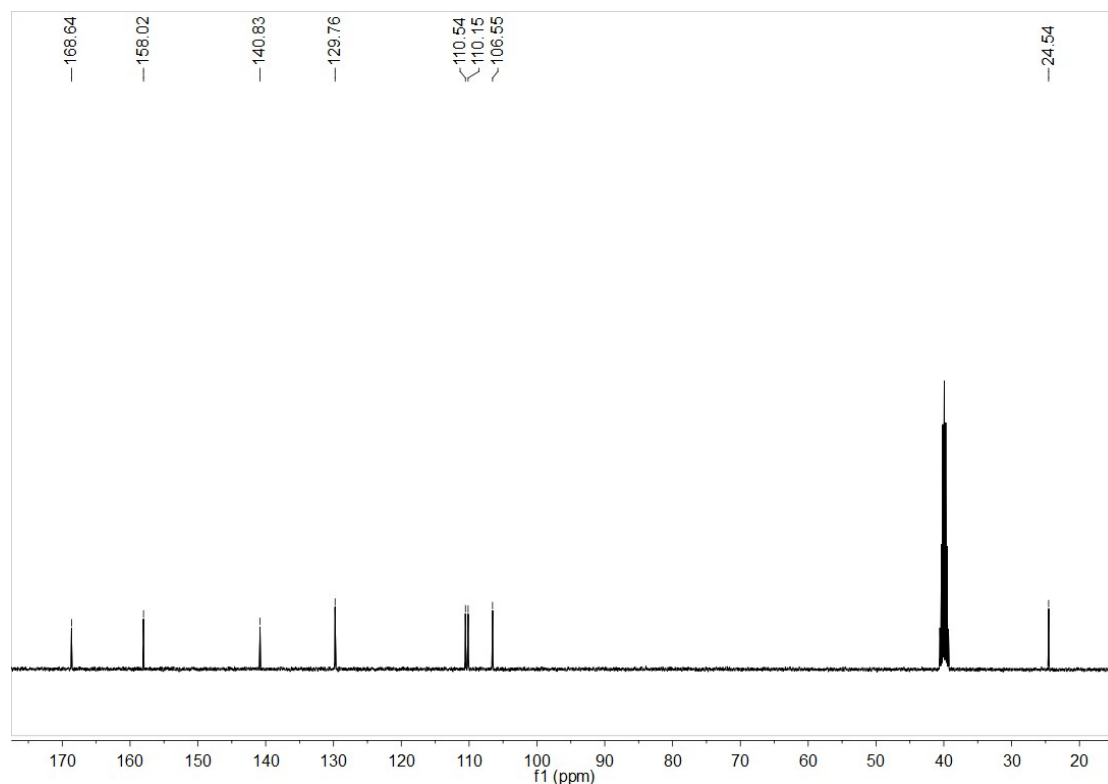

**Figure S14** The <sup>13</sup>C NMR spectra of the compound CS. <sup>13</sup>C NMR (101 MHz, Chloroform-d)  $\delta$  167.93, 163.23, 155.85, 142.90, 140.81, 135.01, 133.08, 130.02, 129.53, 129.12, 128.89, 125.50, 122.44, 116.09, 113.46, 112.31, 110.69, 95.89, 49.42, 45.31, 32.04, 29.81, 29.48, 28.52, 27.12, 22.81, 12.53.

### References:

1. G. Cui, Z. Ye, J. Chen, G. Wang and J. Yuan, *Talanta*, 2011, **84**, 971-976.
2. L. Zhang, R. P. Liang, S. J. Xiao, J. M. Bai, L. L. Zheng, L. Zhan, X. J. Zhao, J. D. Qiu and C. Z. Huang, *Talanta*, 2014, **118**, 339-347.
3. M. Zhuang, C. Ding, A. Zhu and Y. Tian, *Anal. Chem.*, 2014, **86**, 1829-1836.
4. Z. Qianqian, Z. Daixin, Z. Song, C. Kong and J. lie, *ACS Appl. Mater. Interfaces*, 2017, **9**, 2052-2058.
5. R. Liu, L. Zhang, Y. Chen, Z. Huang, Y. Huang and S. Zhao, *Anal. Chem.*, 2018, **90**, 4452-4460.
